# Supplementary material for: The ICAD (Iterative Cavity Enhanced DOAS) Method
Source: Copernicus journal article supplement (doi:10.5194/amt-2019-1), 2019-01-22
Supplement: Supplementary file [file amt-2019-1-RC1-supplement.pdf]

## AMT reviewer's comments

The authors have submitted a very interesting paper describing their work on the development and implementation of the ICAD method for CE-DOAS. This presents in my opinion novel and important work in the field of cavity enhanced spectroscopy which allows cavity enhanced measurements to be made without being limited by the stability of the light source and should be published in Atmospheric Measurement Techniques. I have no issues with the structure and content of the paper and there are only some minor typographical errors which need to be corrected. These are listed below.

Page 5, line 9, please change 'lenght' to length

Page 5, line 9, please change 'optial' to optical

Page 6, line 29, please change 'me' to be

Page 8, line 2, please change 'aerol' to aerosol

Page 8, line 8, please change 'calucate' to calculate

Page 10, line 12, please change 'strop' to stop

Page 11, line 4, please change 'instrreducing' to reducing

Page 11, line 5, please delete 'andument'

Page 11, line 30, please change 'too' to 'to'

Page 11, line 30, please change 'good' to 'well'

Page 12, line 14, please change 'to built a cavity set up' to 'a cavity setup to be built'

Page 14, line 19, please change 'NO2' to 'NO<sub>2</sub>'

Page 21, line 18, please change 'march' to March

Page 23, line 25, please change 'cm3' to cm<sup>3</sup>
